# Supplementary material for: Rheological and Viscoelastic Properties of Chitosan Solutions Prepared with Different Chitosan or Acetic Acid Concentrations
Source: MDPI journal article supplement (doi:10.3390/foods11172692), 2022-09-03
Supplement: s1 [file s1]

Supplementary Materials

# Rheological and Viscoelastic Properties of Chitosan Solutions Prepared with Different Chitosan or Acetic Acid Concentrations

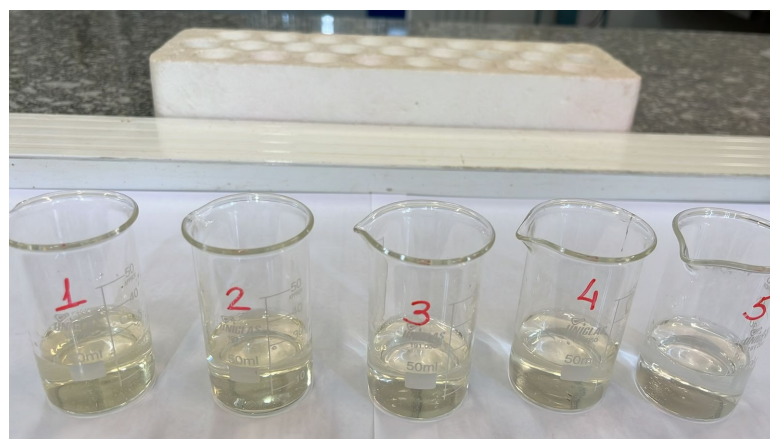

**Figure S1.** Chitosan solutions prepared with 2.5, 2.0, 1.5, 1.0 and 0.5% of chitosan (from left to right), and 1% of acetic acid.

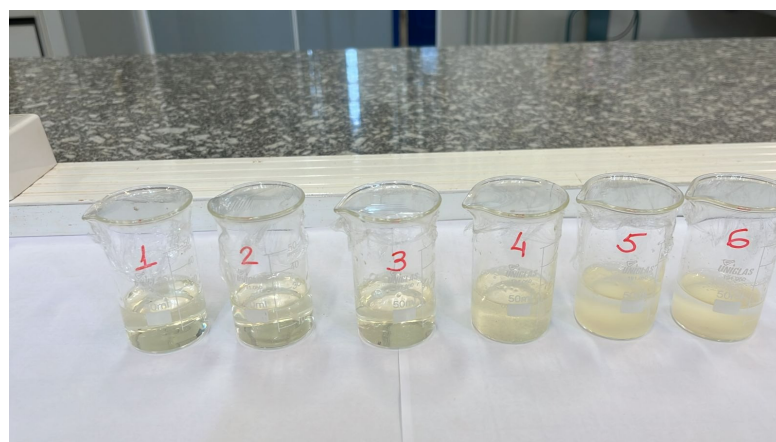

**Figure S2.** Chitosan solutions prepared with 2% of chitosan and 1, 0.8, 0.6, 0.4, 0.2 and 0% (water) of acetic acid (from left to right).

**Table S1.** Values of the consistency index ( $K$ ), the index flow behavior ( $n$ ), and correlation coefficient ( $R^2$ ) calculated by fitting Equation 4 to flow curves data by non-linear regression.

| Temperature (°C) | Chitosan Concentration (%) | $K$ (Pa.s <sup><i>n</i></sup> ) | $n$ (-) | $R^2$ |
|------------------|----------------------------|---------------------------------|---------|-------|
| 25               | 0.5                        | 0.0181                          | 1.025   | 0.999 |
|                  | 1.0                        | 0.0997                          | 0.918   | 0.999 |
|                  | 1.5                        | 0.3066                          | 0.880   | 0.998 |
|                  | 2.0                        | 0.7762                          | 0.832   | 0.994 |
|                  | 2.5                        | 2.2804                          | 0.738   | 0.997 |
| 35               | 0.5                        | 0.0166                          | 0.988   | 0.999 |
|                  | 1.0                        | 0.0653                          | 0.930   | 0.999 |
|                  | 1.5                        | 0.2047                          | 0.888   | 0.999 |

|    |                                     |         |       |       |
|----|-------------------------------------|---------|-------|-------|
| 45 | 2.0                                 | 0.5491  | 0.837 | 0.996 |
|    | 2.5                                 | 1.4540  | 0.769 | 0.997 |
|    | 0.5                                 | 0.0157  | 0.904 | 0.987 |
|    | 1.0                                 | 0.0449  | 0.929 | 0.999 |
|    | 1.5                                 | 0.1280  | 0.903 | 0.997 |
|    | 2.0                                 | 0.3553  | 0.854 | 0.995 |
| 25 | 2.5                                 | 0.9460  | 0.802 | 0.997 |
|    | Acetic acid<br>concentration of (%) |         |       |       |
|    | 0.2                                 | 0.8372  | 0.744 | 0.995 |
|    | 0.4                                 | 1.5257  | 0.722 | 0.990 |
|    | 0.6                                 | 2.2185  | 0.682 | 0.987 |
|    | 0.8                                 | 1.0341  | 0.767 | 0.986 |
| 35 | 1.0                                 | 0.9371  | 0.790 | 0.984 |
|    | 0.2                                 | 0.4915  | 0.767 | 0.988 |
|    | 0.4                                 | 0.1.173 | 0.735 | 0.989 |
|    | 0.6                                 | 1.1743  | 0.735 | 0.987 |
|    | 0.8                                 | 0.8029  | 0.769 | 0.989 |
|    | 1.0                                 | 0.7000  | 0.799 | 0.995 |
| 45 | 0.2                                 | 0.2911  | 0.795 | 0.995 |
|    | 0.4                                 | 0.7078  | 0.763 | 0.989 |
|    | 0.6                                 | 0.6363  | 0.779 | 0.985 |
|    | 0.8                                 | 0.4792  | 0.806 | 0.992 |
|    | 1.0                                 | 0.3202  | 0.848 | 0.985 |

**Table S2.** Constants of polynomial equation ( $K$  or  $n = A[Ac]^2 + B[Ac] + C$ ) calculated by non-linear regression.

| Temperature (°C) | A     | B     | C     | R <sup>2</sup> |
|------------------|-------|-------|-------|----------------|
| <b><i>K</i></b>  |       |       |       |                |
| 25               | -6.16 | 7.24  | -0.33 | 0.655          |
| 35               | -3.47 | 4.18  | -0.12 | 0.746          |
| 45               | -2.21 | 2.57  | -0.08 | 0.817          |
| <b><i>n</i></b>  |       |       |       |                |
| 25               | 0.39  | -0.39 | 0.81  | 0.750          |
| 35               | 0.32  | -0.32 | 0.81  | 0.855          |
| 45               | 0.29  | -0.27 | 0.83  | 0.969          |
